# Supplementary material for: Effects of a 16-Week Digital Intervention on Sports Nutrition Knowledge and Behavior in Female Endurance Athletes with Risk of Relative Energy Deficiency in Sport (REDs)
Source: MDPI journal article supplement (doi:10.3390/nu15051082), 2023-02-21
Supplement: s1 [file s1]

**Table S2. Physical activity characteristics for the FUEL intervention group and the control group**

|                                | FUEL       |            | CON        |            | BF <sub>incl</sub> |
|--------------------------------|------------|------------|------------|------------|--------------------|
|                                | Week 0     | Week 17    | Week 0     | Week 17    |                    |
| <b>Physical activity</b>       |            |            |            |            |                    |
| Total training volume (h/week) | 12.1 ± 3.7 | 10.8 ± 3.9 | 12.4 ± 4.6 | 10.4 ± 6.2 | 0.408              |
| I1 (min/week)                  | 267 ± 204  | 148 ± 103  | 242 ± 152  | 144 ± 60   | 0.386              |
| I2 (min/week)                  | 208 ± 113  | 148 ± 103  | 195 ± 73   | 144 ± 60   | 0.383              |
| I3 (min/week)                  | 71 ± 45    | 47 ± 35    | 52 ± 42    | 50 ± 27    | 0.632              |
| I4 (min/week)                  | 41 ± 40    | 33 ± 27    | 21 ± 16    | 17 ± 23    | 0.380              |
| I5 (min/week)                  | 13 ± 25    | 9 ± 18     | 6 ± 9      | 5 ± 8      | 0.370              |
| NEAT (kcal/day)                | 241 ± 154  | 236 ± 135  | 343 ± 180  | 244 ± 105  | 2.085              |

Abbreviations: BF<sub>incl</sub> = Bayes factor for inclusion of group \* time interaction, CON: control group, FUEL: FUEL intervention group, NEAT: Non Exercise Activity Thermogenesis, NS: No support for the group x time interaction effect being the best model.
