# Supplementary material for: Effects of a 16-Week Digital Intervention on Sports Nutrition Knowledge and Behavior in Female Endurance Athletes with Risk of Relative Energy Deficiency in Sport (REDs)
Source: MDPI journal article supplement (doi:10.3390/nu15051082), 2023-02-21
Supplement: s1 [file s1]

**Table S1.** Correct answers from the telephone interview on sports nutrition knowledge

| Statements (correct answer)                                                                                          | FUEL              |                   | CON               |                   |
|----------------------------------------------------------------------------------------------------------------------|-------------------|-------------------|-------------------|-------------------|
|                                                                                                                      | Week 0            | Week 17           | Week 0            | Week 17           |
| <i>I should eat the same types of food and amounts every day (false)</i>                                             | 83%               | 100%              | 100%              | 100%              |
| <i>My vitamin- and mineral needs are so high that it is hard to fulfill through ordinary food (false)</i>            | 72%               | 93%               | 70%               | 80%               |
| <i>The absence of menstruation for longer or short periods is due to a high training load per se (false)</i>         | 31%               | 59%               | 20%               | 20%               |
| <i>An athlete who is amenorrheic have the potential to regain her period through eating more food (true)</i>         | 83%               | 100%              | 50%               | 80%               |
| <i>It is smart for me to train fasted (false)</i>                                                                    | 76%               | 97%               | 80%               | 90%               |
| <i>Protein supplements contribute to a better protein synthesis than protein from ordinary food (false)</i>          | 93%               | 100%              | 90%               | 80%               |
| <i>Athletes who are amenorrheic often have a lower resting metabolic rate than those who are eumenorrheic (true)</i> | 31%               | 83%               | 20%               | 30%               |
| <i>I should avoid eating saturated fat (false)</i>                                                                   | 83%               | 86%               | 30%               | 10%               |
| <i>I should avoid eating food and drink with added sugar like cakes and other treats (false)</i>                     | 83%               | 100%              | 20%               | 20%               |
| <i>Endurance training does not increase my daily need for protein (false)</i>                                        | 83%               | 90%               | 90%               | 90%               |
| <i>I should choose low fat foods in order to maintain a low weight (false)</i>                                       | 93%               | 100%              | 90%               | 100%              |
| <i>I should supplement with vitamins and minerals to make sure I get enough (false)</i>                              | 41%               | 79%               | 80%               | 60%               |
| <i>I should consume carbohydrates on training sessions and competitions lasting &gt;1,5 hours (true)</i>             | 100%              | 100%              | 100%              | 100%              |
| <i>For me there is no need to eat a recovery meal (false)</i>                                                        | 97%               | 100%              | 90%               | 100%              |
| <i>It is difficult to get enough protein from ordinary food (false)</i>                                              | 86%               | 100%              | 60%               | 80%               |
| <i>Whole wheat products are what I should choose as my main carbohydrate source (false)</i>                          | 35%               | 83%               | 20%               | 10%               |
| <i>I need more iron than other female athletes who are not endurance athletes (true)</i>                             | 76%               | 79%               | 60%               | 70%               |
| <i>A high dietary fiber content may be the reason for an insufficient energy intake (true)</i>                       | 41%               | 90%               | 40%               | 50%               |
| <i>As a female endurance athlete, I should maintain the same body weight throughout the year (false)</i>             | 86%               | 97%               | 80%               | 80%               |
| <i>Fruit and vegetables are sufficient snacking meals for me (false)</i>                                             | 48%               | 97% <sup>c</sup>  | 20%               | 10%               |
| <b>Total number of correct answers</b>                                                                               | <b>14.3 ± 2.6</b> | <b>18.3 ± 1.5</b> | <b>12.1 ± 2.6</b> | <b>12.6 ± 2.2</b> |

For the FUEL intervention group, post data for the telephone interview were missing for *n*=2 participants. For the control group, pre data for the telephone interview were missing for *n*=2 participants and pre and post data were missing for *n*=3 participants. Abbreviations: FUEL: the FUEL intervention group, CON: control group.
